# Supplementary material
Source: PubMed Central journal article supplement (PMC7749625)
Supplement: NIHMS1653319-supplement-Supplemental_Table_1.pdf [file NIHMS1653319-supplement-Supplemental_Table_1.pdf]

**Supplemental Table S1.** The oligos used for generation of sgRNA expression vectors

| Name                | Sequence                                                                              |
|---------------------|---------------------------------------------------------------------------------------|
| <i>p53</i> sgRNA#1  | Forward: 5'-caccgACTGGGACGGAACAGCTTTG3'<br>Reverse: 5'-aaacCAAAGCTGTTCCGTCCCAGTc-3'   |
| <i>p53</i> sgRNA#2  | Forward: 5'-caccgTCTGTGCGCCGGTCTCTCCC-3'<br>Reverse: 5'-aaacGGGAGAGACCGGCGCACAGAc-3'  |
| <i>IRP2</i> sgRNA#1 | Forward: 5'-caccgTACTCAATACGGGTCTTGT-3'<br>Reverse: 5'-aaacACAAGACCCGTATTGAGTAAc-3'   |
| <i>IRP2</i> sgRNA#2 | Forward: 5'-caccgGCTGCTGTACGAAATTGTGA-3'<br>Reverse: 5'-aaacTCACAATTTTCGTACAGCAGCc-3' |
