# Supplementary material
Source: PubMed Central journal article supplement (PMC7749625)
Supplement: NIHMS1653319-supplement-Supplemental_Table_2.pdf [file NIHMS1653319-supplement-Supplemental_Table_2.pdf]

**Supplemental Table S2.** The primers used for genotyping mouse strains and cell lines

| Name                                    | Sequence                                                                                                                      |
|-----------------------------------------|-------------------------------------------------------------------------------------------------------------------------------|
| <i>Irp2</i> -KO<br>mouse genotyping     | Forward P1: 5'-AAAGAGTGGTCCACTGTGAG-3'<br>Reverse P2: 5'-TGGAATACCGGCAATGGTGG-3'<br>Reverse P3: 5'-AGCTCATTCTCCACTCATG-3'     |
| <i>TAp63</i> -KO<br>mouse genotyping    | Forward P1: 5'-ACTGGTGAGCTTGTAGAATCGG-3'<br>Forward P2: 5'-CCACATAGCCATATCTGCC-3'<br>Reverse P3: 5'-ACTGAGCATATAGGCCTAGCAC-3' |
| <i>IRP2</i> -KO<br>cell line genotyping | Forward: 5'-GTCTAACTTTTTGCTATGGCA-3'<br>Reverse: 5'-GGAAAAGGGCACTTCAACA-3'                                                    |
| <i>p53</i> -KO<br>cell line genotyping  | Forward: 5'-GGCATAACTGCACCCTTGGT-3'<br>Reverse: 5'-GGAAAAGGGCACTTCAACA-3'                                                     |
